# Supplementary material for: A novel method to detect mutation in DNA by utilizing exponential amplification reaction triggered by the CRISPR-Cas9 system
Source: Royal Society of Chemistry journal article supplement (doi:10.1039/d1nr00438g), 2021-01-01
Supplement: d1nr00438g1.pdf [file d1nr00438g1.pdf]

Supporting Information for

## **A novel method to detect mutation in DNA by utilizing exponential amplification reaction triggered by the CRISPR-Cas9 system**

Jayeon Song<sup>†</sup>, Soohyun Kim<sup>†</sup>, Hyo Yong Kim, Kyung Hoon Hur, Yoosik Kim, and Hyun Gyu Park\*

Department of Chemical and Biomolecular Engineering (BK 21+ program), KAIST, Daehak-ro 291, Yuseong-gu, Daejeon 34141, Republic of Korea

<sup>†</sup> These authors equally contributed to this work.

\* To whom correspondence should be addressed.

E-mail: hgpark@kaist.ac.kr (H.G. Park); Phone: +82-42-350-3932; Fax: +82-42-350-3910.

**Table S1.** Oligonucleotide sequences employed in this work.

| Name                                                   | DNA sequence (5'→3')                                                                                                                                                                                                                                                                                                                                                                          |
|--------------------------------------------------------|-----------------------------------------------------------------------------------------------------------------------------------------------------------------------------------------------------------------------------------------------------------------------------------------------------------------------------------------------------------------------------------------------|
| Target mutant DNA<br>(insertion mutation) <sup>a</sup> | GCA TAC GTG ATG GCT GGT GTG GGC TCC CCT <b>GGC</b> TCC CCA TAT GTC TCC CGC<br>CTC CTG GGC ATC TGC                                                                                                                                                                                                                                                                                             |
| Target wild type DNA                                   | GCA TAC GTG ATG GCT GGT GTG GGC TCC CCA TAT GTC TCC CGC CTC CTG GGC ATC<br>TGC                                                                                                                                                                                                                                                                                                                |
| sgRNA 1<br>(insertion mutation)                        | AUG GCU GGU GUG GGC UCC CC                                                                                                                                                                                                                                                                                                                                                                    |
| sgRNA 2<br>(insertion mutation)                        | CCA GGA GGC GGG AGA CAU AU                                                                                                                                                                                                                                                                                                                                                                    |
| EXPAR template 1 <sup>b</sup>                          | TAT GGG GAG CCA GGG AAC AGA <i>TCC</i> ATA TGG GGA GCC AGG A                                                                                                                                                                                                                                                                                                                                  |
| Target mutant DNA 2<br>(L858R mutation) <sup>a</sup>   | TGT CCC TCA CAG CAG GGT CTT CTC TGT TTC AGG GCA TGA ACT ACT TGG AGG ACC<br>GTC GCT TGG TGC ACC GCG ACC TGG CAG CCA GGA ACG TAC TGG TGA AAA CAC<br>CGC AGC ATG TCA AGA TCA CAG ATT TTG GGC <b>GGG</b> CCA AAC TGC TGG GTG CGG<br>AAG AGA AAG AAT ACC ATG CAG AAG GAG GCA AAG TAA GGA GGT GGC TTT AGG<br>TCA GCC AGC ATT TTC CTG ACA CCA GGG ACC AGG CTG CCT TCC CAC TAG CTG TAT<br>TGT TTA ACA |
| Target wild type DNA 2 <sup>a</sup>                    | TGT CCC TCA CAG CAG GGT CTT CTC TGT TTC AGG GCA TGA ACT ACT TGG AGG ACC<br>GTC GCT TGG TGC ACC GCG ACC TGG CAG CCA GGA ACG TAC TGG TGA AAA CAC<br>CGC AGC ATG TCA AGA TCA CAG ATT TTG GGC <b>TGG</b> CCA AAC TGC TGG GTG CGG<br>AAG AGA AAG AAT ACC ATG CAG AAG GAG GCA AAG TAA GGA GGT GGC TTT AGG<br>TCA GCC AGC ATT TTC CTG ACA CCA GGG ACC AGG CTG CCT TCC CAC TAG CTG TAT<br>TGT TTA ACA |
| sgRNA 1<br>(L858R mutation)                            | UCA AGA UCA CAG AUU UUG GG                                                                                                                                                                                                                                                                                                                                                                    |
| sgRNA 2<br>(L858R mutation)                            | CUC UUC CGC ACC CAG CAG UU                                                                                                                                                                                                                                                                                                                                                                    |
| EXPAR template 2 <sup>b</sup><br>(L858R mutation)      | GTT TGG CCC GCC CAAC AGA <i>TCC</i> A GTT TGG CCC GCC C                                                                                                                                                                                                                                                                                                                                       |
| sgRNA_R-primer                                         | AGC ACC GAC TCG GTG CCA CTT                                                                                                                                                                                                                                                                                                                                                                   |
| sgRNA 1_F-primer                                       | TAA TAC GAC TCA CTA TAG ATG GCT GGT GTG GGC TCC CCG TTT TAG AGC TAG AAA<br>TAG C                                                                                                                                                                                                                                                                                                              |
| sgRNA 2_F-primer                                       | TAA TAC GAC TCA CTA TAG CCA GGA GGC GGG AGA CAT ATG TTT TAG AGC TAG<br>AAA TAG C                                                                                                                                                                                                                                                                                                              |
| MM 1 target <sup>a,c</sup>                             | GCA TAC GTG ATG GCT GGT GTG GGC TCC CCT <b>AGC</b> TCC CCA TAT GTC TCC CGC<br>CTC CTG GGC ATC TGC                                                                                                                                                                                                                                                                                             |
| MM 2 target <sup>a,c</sup>                             | GCA TAC GTG ATG GCT GGT GTG GGC TCC CCT <b>AAC</b> TCC CCA TAT GTC TCC CGC<br>CTC CTG GGC ATC TGC                                                                                                                                                                                                                                                                                             |
| MM 3 target <sup>a,c</sup>                             | GCA TAC GTG ATG GCT GGT GTG GGC TCG CCT <b>AAC</b> TCC CCA TAT GTC TCC CGC<br>CTC CTG GGC ATC TGC                                                                                                                                                                                                                                                                                             |
| MM 4 target <sup>a,c</sup>                             | GCA TAC GTG ATG GCT GGT GTG GGC TCG CCT <b>AAC</b> TCC CCA <del>TTT</del> GTC TCC CGC<br>CTC CTG GGC ATC TGC                                                                                                                                                                                                                                                                                  |

- 
- (a) The bold characters indicate the target mutation. Red color characters represent the PAM sequence.
  - (b) The italic letters indicate the recognition site of Nt.AlwI.
  - (c) The underlined bases indicate the nonspecific bases within target insertion mutation. MM# indicates the mismatched target mutation samples containing imperfect 9 bp target insertion mutations in which a few bases (#) from one to four are replaced by different bases.
-

**Table S2.** Comparison of the CRISPR-EXPAR method with previous mutation detection methods.

| Method                                        | Linear range   | Detection limit | Limitations                                                                                                          | Reference |
|-----------------------------------------------|----------------|-----------------|----------------------------------------------------------------------------------------------------------------------|-----------|
| Rolling circle amplification                  | 0.02 pM - 2 pM | 8.6 fM          | <ul style="list-style-type: none"> <li>▪ Low sensitivity</li> <li>▪ Prior ligation step for padlock probe</li> </ul> | S1        |
| Strand-displacement polymerase                | 0.1 pM - 50 nM | 0.08 pM         | <ul style="list-style-type: none"> <li>▪ Low sensitivity</li> </ul>                                                  | S2        |
| Toehold-mediated strand displacement reaction | 2 pM - 10 nM   | 1.8 pM          | <ul style="list-style-type: none"> <li>▪ Low sensitivity</li> <li>▪ Multiple assay steps</li> </ul>                  | S3        |
| Helicase-dependent amplification              | 10 pM – 1 nM   | 20 pM           | <ul style="list-style-type: none"> <li>▪ Preparation of gold nanoparticles</li> </ul>                                | S4        |
| Strand displacement amplification             | 1 fM – 1 nM    | 0.1 fM          | <ul style="list-style-type: none"> <li>▪ Non-specific signal</li> <li>▪ Extra step for hemin incubation</li> </ul>   | S5        |
| CRISPR-EXPAR                                  | 1 fM - 1 nM    | 0.44 fM         | -                                                                                                                    | This work |

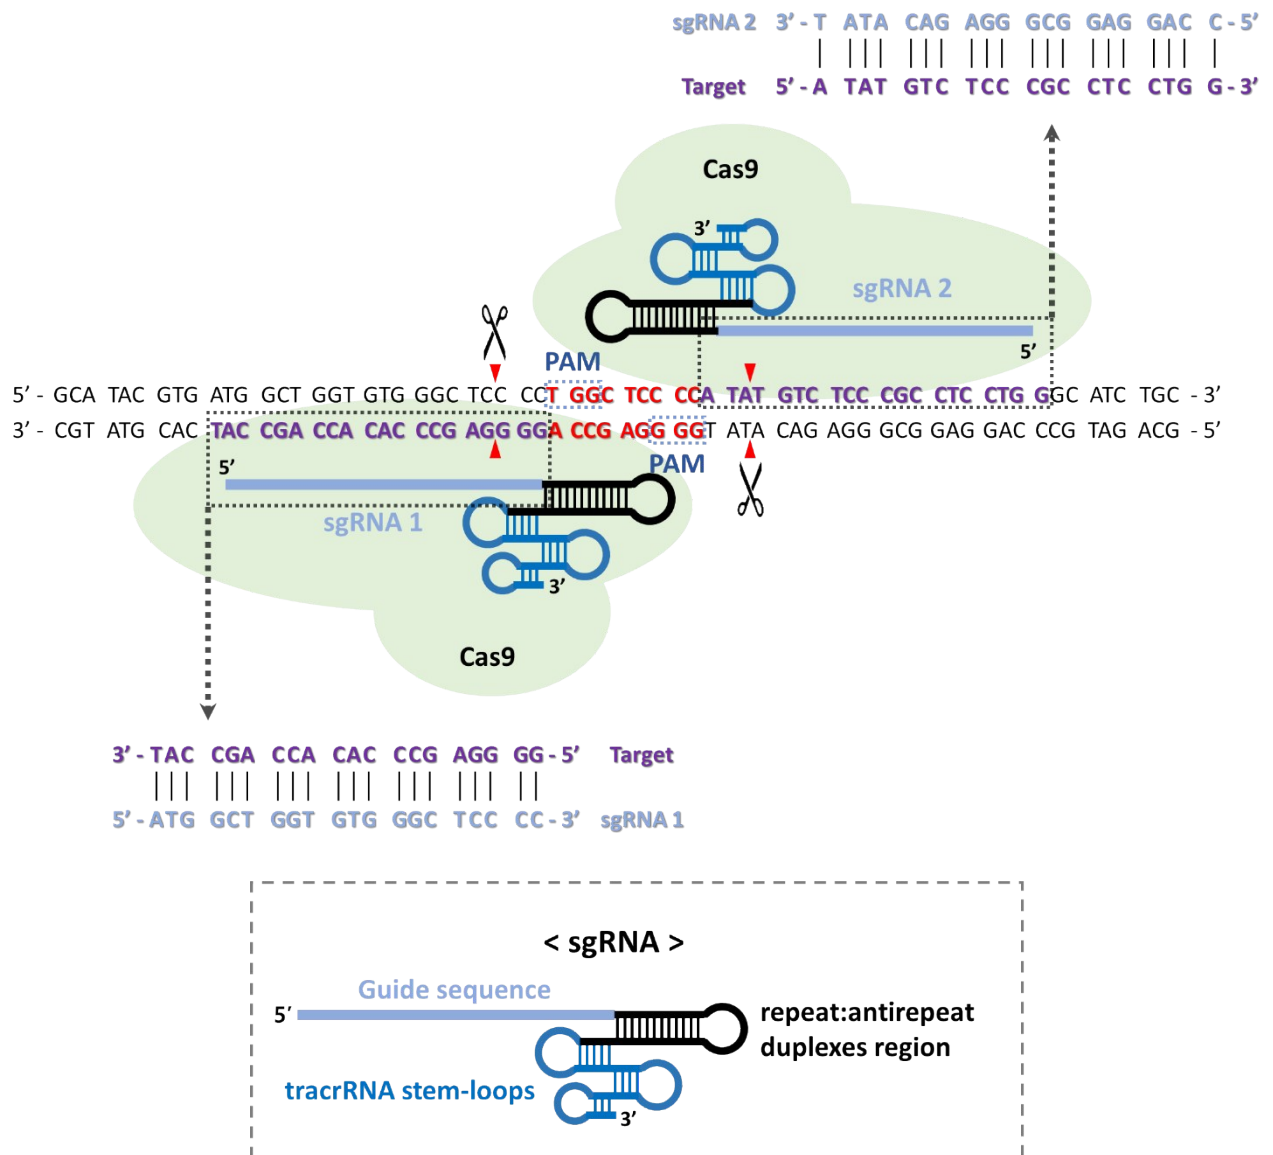

**Figure S1.** sgRNA sequence design. sgRNAs employed in this work consist of three segments: guide sequence, repeat:antirepeat duplexes region, and three tracrRNA stem-loops. sgRNA can bind with Cas9 to form Cas9/sgrNA complex which promotes mutation-specific cleavage of target DNA.

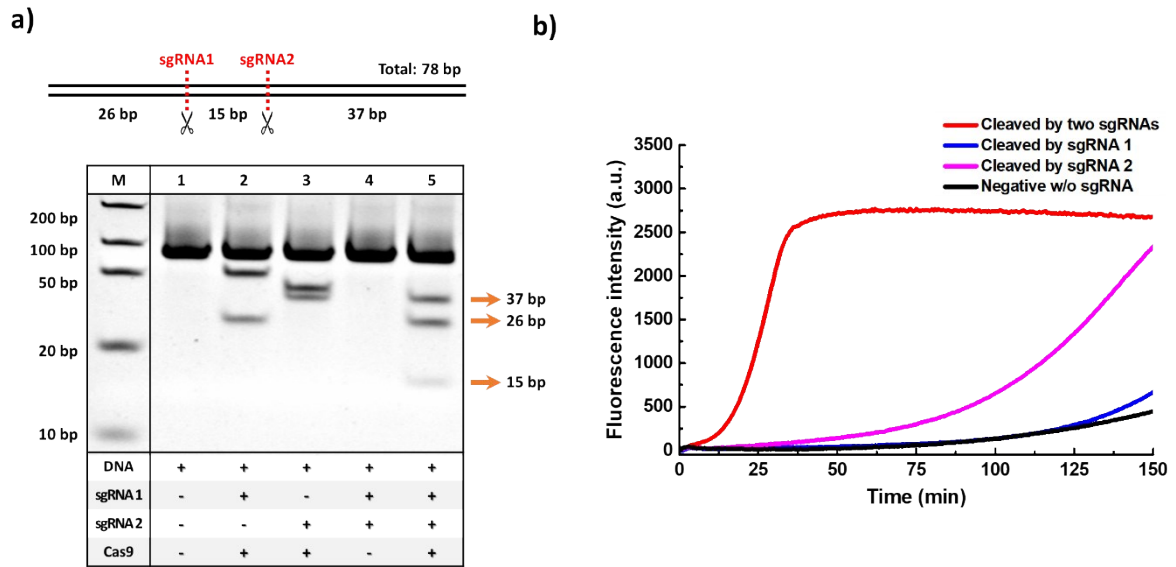

**Figure S2.** The requirement for two sgRNAs to promote the two Cas9-mediated cleavage reactions in the CRISPR-EXPAR reaction. a) PAGE analysis of the CRISPR-EXPAR products (1: Mutant DNA, 2: Mutant DNA + sgRNA 1 + Cas9, 3: Mutant DNA + sgRNA 2 + Cas9, 4: Mutant DNA + Two sgRNAs, 5: Mutant DNA + Two sgRNAs + Cas9). b) Real-time fluorescence curves during the CRISPR-EXPAR reaction. The final concentration of DNA, sgRNAs, and Cas9 are 200 nM, 2  $\mu$ M, and 2  $\mu$ M, respectively. M is marker for band analysis (Ultra low range ladder).

a) NEBuffer 2 : CutSmart buffer = 2 : 1

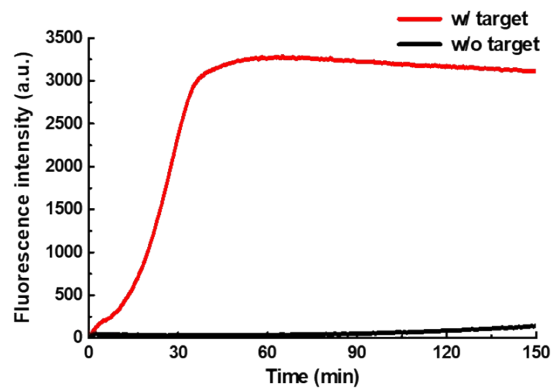

b) NEBuffer 2 : CutSmart buffer = 1 : 1

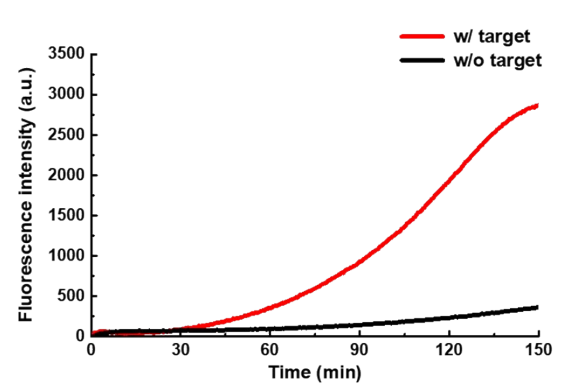

c) NEBuffer 2 : CutSmart buffer = 1 : 2

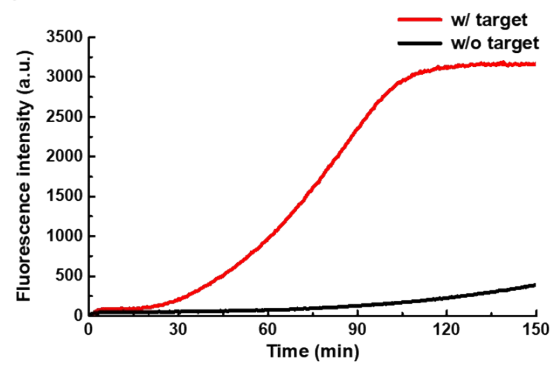

d) Only NEBuffer 2

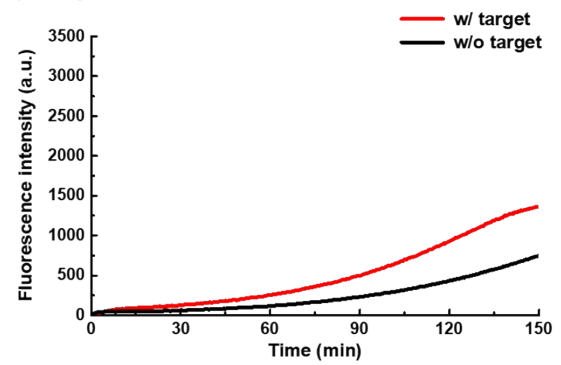

**Figure S3.** Optimization for reaction buffer concentration. The real-time fluorescence curves were obtained during the CRISPR-EXPAR reaction. The final concentration of DNA, sgRNAs, and Cas9 are 1 nM, 10 nM, and 10 nM, respectively.

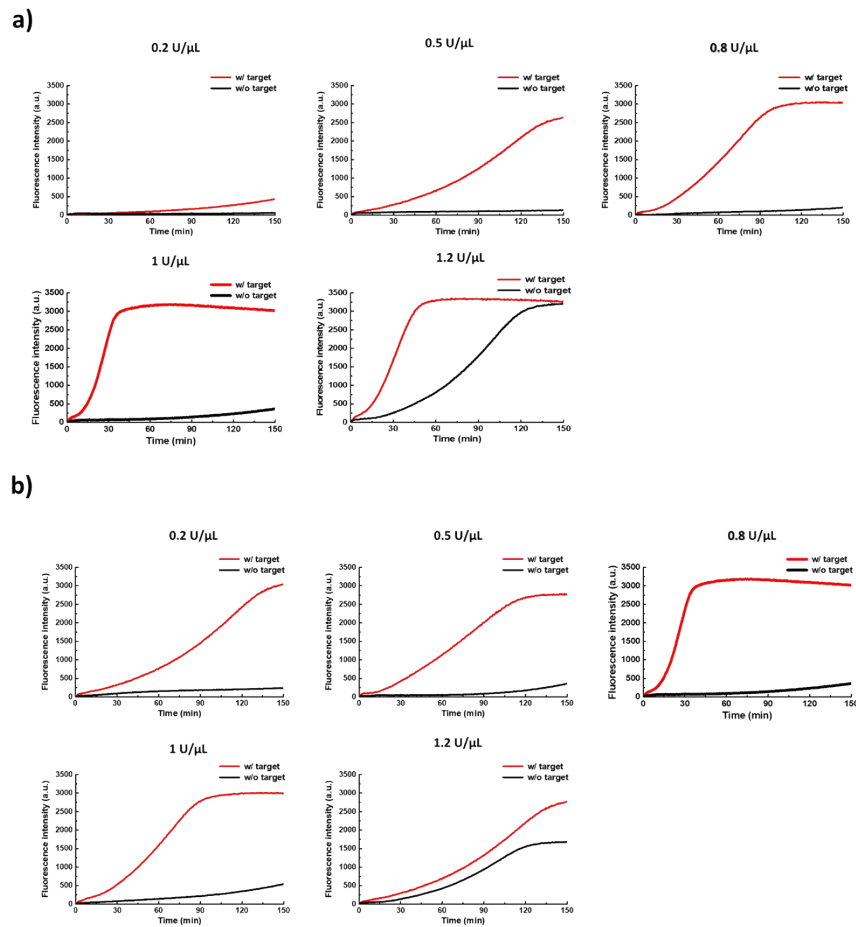

**Figure S4.** Optimization for the concentrations of the enzymes employed in the CRISPR-EXPAR reaction. a) Optimization of DNA polymerase (Klenow fragment) concentration. The real-time fluorescence curves were obtained during the CRISPR-EXPAR reaction with 1 nM target DNA (red line) and without target DNA (black line). The concentrations of Klenow fragment are 0.2 U/ $\mu$ L, 0.5 U/ $\mu$ L, 0.8 U/ $\mu$ L, 1.0 U/ $\mu$ L, and 1.2 U/ $\mu$ L. b) Optimization of nicking endonuclease (Nt.AlwI) concentration. The real-time fluorescence curves were obtained during the CRISPR-EXPAR reaction with 1 nM target DNA (red line) and without target DNA (black line). The concentrations of Nt.AlwI are 0.2 U/ $\mu$ L, 0.5 U/ $\mu$ L, 0.8 U/ $\mu$ L, 1.0 U/ $\mu$ L, and 1.2 U/ $\mu$ L.



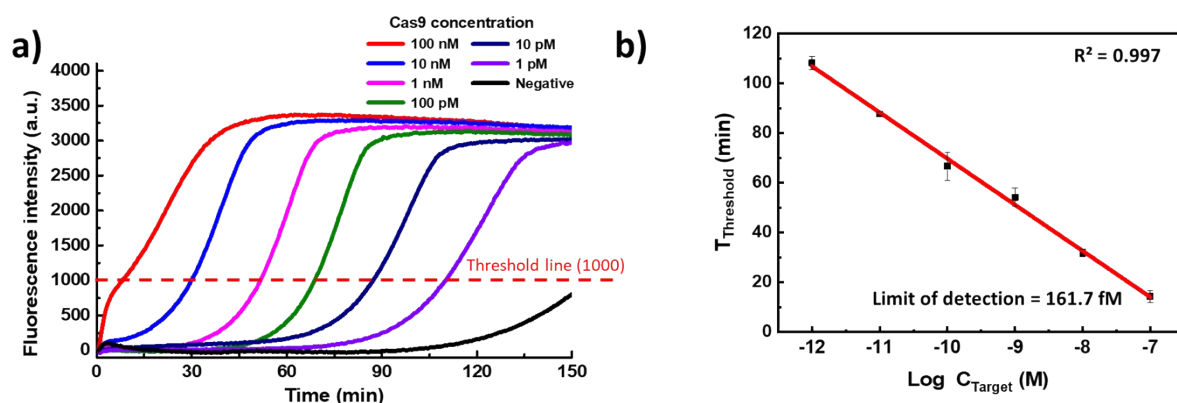

**Figure S5.** Assay of Cas9 activity. a) Real-time fluorescence curve for the CRISPR-EXPAR reaction by employing Cas9 at varying concentrations in the range from 1 pM to 100 nM. b) Relationship between the threshold time ( $T_{\text{Threshold}}$ ) and the logarithm of the concentration of Cas9, where  $T_{\text{Threshold}}$  is defined as the reaction time at which the fluorescence signal exceeds the threshold line (fluorescence intensity: 1000) and  $C_{\text{Target}}$  is the concentration of Cas9. The error bar is determined from triplicate measurements.

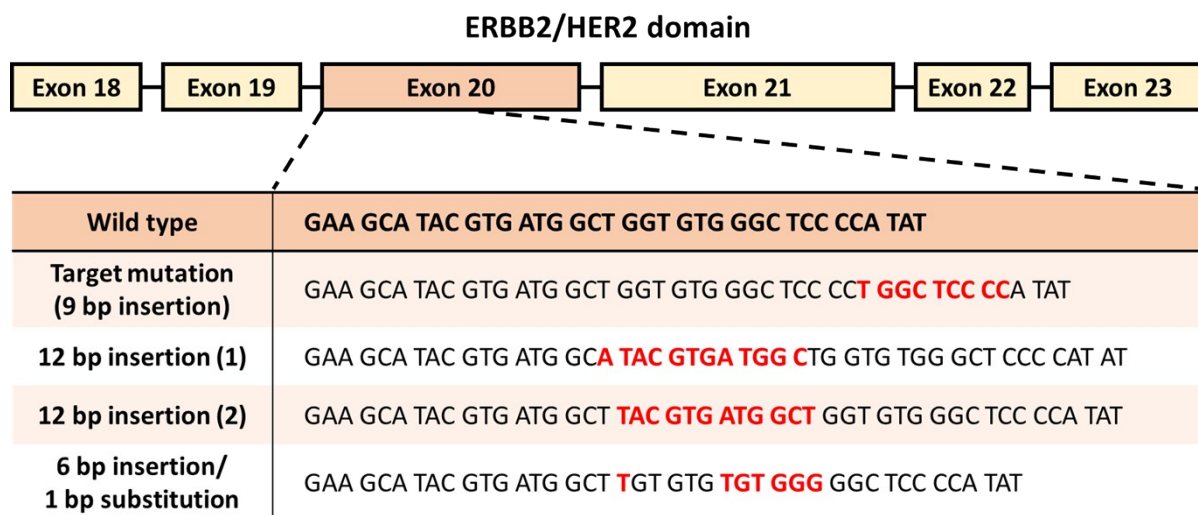

**Figure S6.** Insertion mutations on HER2 exon 20 studied in this work. Red color characters represent the insertion mutation.

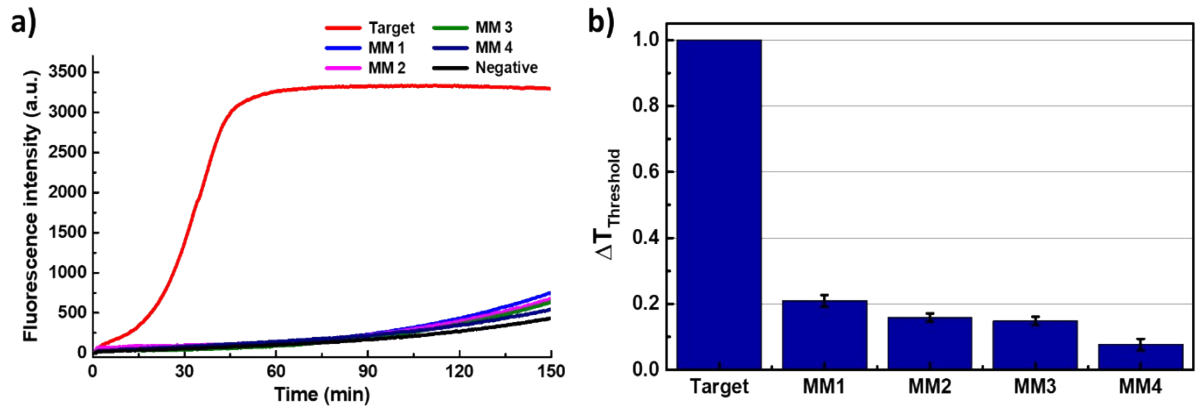

**Figure S7.** Selectivity of the CRISPR-EXPAR reaction system. a) Real-time fluorescence signal produced from target mutant DNA and nontarget mutant DNAs containing imperfect 9 bp target insertion mutations in which single base (MM1), two bases (MM2), three bases (MM3), and four bases (MM4) are replaced by different bases. b) The  $\Delta T_{\text{Threshold}}$  is defined as  $(T_{\text{Threshold (Blank)}} - T_{\text{Threshold (MM target)}})/(T_{\text{Threshold (Blank)}} - T_{\text{Threshold (Target)}})$ , where  $T_{\text{Threshold (Blank)}}$ ,  $T_{\text{Threshold (MM target)}}$ , and  $T_{\text{Threshold (Target)}}$  are the threshold times from the reaction samples containing no target mutation, imperfect 9 bp target mutation, and perfect 9 bp target insertion mutation, respectively. The detailed sequences are presented in table S1. The error bar is determined from triplicate measurements.

## References

- S1. Cheng. Y., et al., Anal Biochem, 2008, **378**, 123-126.
- S2. He. Y., et al., Biosens Bioelectron, 2012, **31**, 310-315.
- S3. Zhu. J., et al., Biosens Bioelectron, 2014, **59**, 26-281.
- S4. Valentini. P., et al., ACS NANO, 2013, **7**, 5530-5538.
- S5. Wang. H.-Q., et al., Anal Chem, 2011, **83**, 1883-1889.
